# Supplementary material for: The Effect of Supplemental Irrigation on a Dry-Farmed Vitis vinifera L. cv. Zinfandel Vineyard as a Function of Vine Age
Source: MDPI journal article supplement (doi:10.3390/agronomy13081998), 2023-07-28
Supplement: s1 [file s1]

**Supplemental Table S1.** Two-way analysis of variance (ANOVA) showing senescence (leaf chlorosis and abscission) tracking during the 2021 growing season ( $n = 12$ ) by treatment and vine age. Treatment means followed by the standard error of the mean. Different letters within a column indicate differences between treatment groups based on Student's  $t$ -test ( $n = 12$ ). Significant  $p$ -values ( $<0.05$ ) are shown in the table.

| Growth Stage      |                      | Degree of Leaf Chlorosis | Degree of Leaf Abscission |
|-------------------|----------------------|--------------------------|---------------------------|
| Harvest           | <b>Treatment</b>     |                          |                           |
|                   | Irrigated            | 1.25 ± 0.13 a            | 0.39 ± 0.11 a             |
|                   | Dry-farmed           | 1.17 ± 0.12 a            | 0.67 ± 0.14 a             |
|                   | <b>Vine Age</b>      |                          |                           |
|                   | Young                | 1.63 ± 0.18 a            | 0.79 ± 0.19 a             |
|                   | Old                  | 0.96 ± 0.11 b            | 0.29 ± 0.11 ab            |
|                   | Control              | 1.04 ± 0.13 b            | 0.50 ± 0.15 b             |
|                   | <i>p-value</i>       | <b>0.0119</b>            | <b>0.0320</b>             |
|                   | <b>Treatment (T)</b> | 0.6138                   | 0.1104                    |
|                   | <b>Vine Age (A)</b>  | <b>0.0026</b>            | 0.0647                    |
| <b>T x A</b>      |                      | 0.2609                   | 0.1001                    |
| Harvest + 2 weeks | <b>Treatment</b>     |                          |                           |
|                   | Irrigated            | 1.42 ± 0.13 a            | 0.83 ± 0.20 a             |
|                   | Dry-farmed           | 1.42 ± 0.12 a            | 0.81 ± 0.15 a             |
|                   | <b>Vine Age</b>      |                          |                           |
|                   | Young                | 1.75 ± 0.19 a            | 1.38 ± 0.27 a             |
|                   | Old                  | 1.17 ± 0.08 b            | 0.375 ± 0.13 b            |
|                   | Control              | 1.33 ± 0.13 b            | 0.71 ± 0.16 b             |
|                   | <i>p-value</i>       | 0.1104                   | <b>0.0109</b>             |
|                   | <b>Treatment (T)</b> | 1.0000                   | 0.9044                    |
|                   | <b>Vine Age (A)</b>  | <b>0.0167</b>            | <b>0.0026</b>             |
| <b>T x A</b>      |                      | 0.7165                   | 0.2042                    |
| Harvest + 4 weeks | <b>Treatment</b>     |                          |                           |
|                   | Irrigated            | 2.33 ± 0.18 a            | 1.22 ± 0.18 a             |
|                   | Dry-farmed           | 2.14 ± 0.13 a            | 1.25 ± 0.14 a             |
|                   | <b>Vine Age</b>      |                          |                           |
|                   | Young                | 2.67 ± 0.25 a            | 1.58 ± 0.25 a             |
|                   | Old                  | 2.00 ± 0.10 b            | 1.04 ± 0.11 a             |
|                   | Control              | 2.04 ± 0.19 b            | 1.08 ± 0.19 a             |
|                   | <i>p-value</i>       | 0.0962                   | 0.3812                    |
|                   | <b>Treatment (T)</b> | 0.3762                   | 0.9021                    |
|                   | <b>Vine Age (A)</b>  | <b>0.0250</b>            | 0.0990                    |
| <b>T x A</b>      |                      | 0.5521                   | 0.7493                    |
| Harvest + 6 weeks | <b>Treatment</b>     |                          |                           |
|                   | Irrigated            | 2.78 ± 0.19 a            | 2.11 ± 0.17 a             |
|                   | Dry-farmed           | 2.64 ± 0.17 a            | 1.89 ± 0.18 a             |
|                   | <b>Vine Age</b>      |                          |                           |
|                   | Young                | 3.33 ± 0.26 a            | 2.50 ± 0.28 a             |
|                   | Old                  | 2.29 ± 0.13 b            | 1.88 ± 0.07 b             |
|                   | Control              | 2.50 ± 0.20 b            | 1.63 ± 0.19 b             |
|                   | <i>p-value</i>       | <b>0.0140</b>            | 0.0611                    |
|                   | <b>Treatment (T)</b> | 0.5609                   | 0.3456                    |
|                   | <b>Vine Age (A)</b>  | <b>0.0015</b>            | <b>0.0099</b>             |
| <b>T x A</b>      |                      | 0.6565                   | 0.8329                    |
| Dormancy          | <b>Treatment</b>     |                          |                           |
|                   | Irrigated            | 4.25 ± 0.20 a            | 3.64 ± 0.26 a             |
|                   | Dry-farmed           | 3.89 ± 0.22 a            | 3.25 ± 0.26 a             |
|                   | <b>Vine Age</b>      |                          |                           |
|                   | Young                | 4.79 ± 0.23 a            | 4.04 ± 0.33 a             |

|                      |               |                |
|----------------------|---------------|----------------|
| Old                  | 3.46 ± 0.25 b | 2.96 ± 0.29 ab |
| Control              | 3.96 ± 0.24 b | 3.33 ± 0.32 b  |
| <i>p-value</i>       | <b>0.0068</b> | 0.2116         |
| <b>Treatment (T)</b> | 0.1951        | 0.2904         |
| <b>Vine Age (A)</b>  | <b>0.0008</b> | 0.0550         |
| <b>T x A</b>         | 0.9603        | 0.9275         |

**Supplemental Table S2.** Two-way analysis of variance (ANOVA) showing leaf water potential measurements at véraison (07/23/21) and at véraison + 4 weeks (08/20/21). Treatment means followed by standard error of the mean. Different letters within a column indicate significant differences between treatment groups based on Student's *t*-test (*n* = 3). Significant *p*-values (< 0.05) are shown in bold fonts.

| Growth Stage       |                      | Pre-dawn $\Psi_{\text{leaf}}$ (MPa) | Mid-day $\Psi_{\text{leaf}}$ (MPa) |
|--------------------|----------------------|-------------------------------------|------------------------------------|
| Véraison           | <b>Treatment</b>     |                                     |                                    |
|                    | Irrigated            | 4.67 ± 0.31 a                       | 10.89 ± 0.25 a                     |
|                    | Dry-farmed           | 4.67 ± 0.24 a                       | 11.33 ± 0.17 a                     |
|                    | <b>Vine Age</b>      |                                     |                                    |
|                    | Young                | 4.42 ± 0.35 a                       | 11.17 ± 0.25 a                     |
|                    | Old                  | 5.00 ± 0.37 a                       | 11.17 ± 0.25 a                     |
|                    | Control              | 4.58 ± 0.27 a                       | 11.00 ± 0.34 a                     |
|                    | <i>p-value</i>       | 0.7091                              | 0.8176                             |
|                    | <b>Treatment (T)</b> | 1.000                               | 0.2130                             |
|                    | <b>Vine Age (A)</b>  | 0.4995                              | 0.8984                             |
|                    | <b>T x A</b>         | 0.4995                              | 0.8984                             |
| Véraison + 4 weeks | <b>Treatment</b>     |                                     |                                    |
|                    | Irrigated            | 4.12 ± 0.19 a                       | 10.04 ± 0.24 a                     |
|                    | Dry-farmed           | 4.88 ± 0.20 b                       | 10.16 ± 0.37 a                     |
|                    | <b>Vine Age</b>      |                                     |                                    |
|                    | Young                | 4.15 ± 0.27 a                       | 9.65 ± 0.38 a                      |
|                    | Old                  | 4.83 ± 0.32 a                       | 10.48 ± 0.43 a                     |
|                    | Control              | 4.52 ± 0.21 a                       | 10.17 ± 0.26 a                     |
|                    | <i>p-value</i>       | <b>0.0481</b>                       | 0.1959                             |
|                    | <b>Treatment (T)</b> | <b>0.0116</b>                       | 0.7786                             |
|                    | <b>Vine Age (A)</b>  | 0.1314                              | 0.2461                             |
|                    | <b>T x A</b>         | 0.3851                              | 0.1020                             |

**Supplemental Table S3.** Two-way analysis of variance (ANOVA) with interaction showing measurements by vine age and treatment. Treatment means followed by standard error of the mean. Different letters within a column indicate significant differences between treatment groups based on Student's *t*-test (*n* = 12). Significant *p*-values (< 0.05) are shown in bold fonts.

|                      | Cluster count<br>per vine | Yield per<br>vine (kg) | Pruning weights<br>per vine (kg) | Ravaz index       |
|----------------------|---------------------------|------------------------|----------------------------------|-------------------|
| <b>Treatment</b>     |                           |                        |                                  |                   |
| Irrigated            | 55.21 ± 4.62 a            | 8.74 ± 0.85 a          | 1.14 ± 0.07 a                    | 8.04 ± 0.71 a     |
| Dry-farmed           | 50.36 ± 3.36 a            | 6.96 ± 0.53 a          | 1.06 ± 0.08 a                    | 8.36 ± 0.73 a     |
| <b>Vine Age</b>      |                           |                        |                                  |                   |
| Young                | 33.67 ± 1.72 b            | 5.70 ± 0.41 b          | 1.23 ± 0.08 a                    | 5.05 ± 0.41 c     |
| Old                  | 64.48 ± 4.93 a            | 8.98 ± 1.01 a          | 0.95 ± 0.10 b                    | 11.09 ± 0.84 a    |
| Control              | 60.21 ± 4.82 a            | 8.87 ± 0.95 a          | 1.13 ± 0.09 ab                   | 8.46 ± 0.83 b     |
| <i>p-value</i>       | <b>&lt;0.0001</b>         | <b>0.0062</b>          | 0.2224                           | <b>&lt;0.0001</b> |
| <b>Treatment (T)</b> | 0.3069                    | 0.0594                 | 0.4545                           | 0.7012            |
| <b>Vine Age (A)</b>  | <b>&lt;0.0001</b>         | <b>0.0062</b>          | 0.1151                           | <b>&lt;0.0001</b> |
| <b>T x A</b>         | 0.4334                    | 0.1261                 | 0.3464                           | 0.5439            |

**Supplemental Table S4.** Berry fresh weight, dry weight, and seed weight/number analysis on a per single berry basis. Two-way analysis of variance (ANOVA) showing treatment means followed by standard error of the mean. Measurements by treatment and vine age with interaction effects. Different letters within a column indicate significant differences between treatment groups based on Student's *t*-test (*n* = 12). Significant *p*-values (< 0.05) are shown in bold fonts.

|                      | Fresh<br>weight (g) | Fresh skin weight<br>(g) | Fresh seed weight<br>(g) | Seeds per<br>berry | Dried skin<br>weight (g) | Dried seed weight<br>(g) |
|----------------------|---------------------|--------------------------|--------------------------|--------------------|--------------------------|--------------------------|
| <b>Treatment</b>     |                     |                          |                          |                    |                          |                          |
| Irrigated            | 1.80 ± 0.04 a       | 0.13 ± 0.01 a            | 0.07 ± 0.00 a            | 1.97 ± 0.04 a      | 0.05 ± 0.00 a            | 0.05 ± 0.00 a            |
| Dry-farmed           | 1.89 ± 0.03 a       | 0.13 ± 0.01 a            | 0.06 ± 0.00 a            | 2.07 ± 0.04 a      | 0.05 ± 0.00 a            | 0.05 ± 0.00 a            |
| <b>Vine Age</b>      |                     |                          |                          |                    |                          |                          |
| Young                | 1.80 ± 0.04 a       | 0.15 ± 0.01 a            | 0.07 ± 0.00 a            | 2.09 ± 0.05 a      | 0.06 ± 0.01 a            | 0.05 ± 0.00 a            |
| Old                  | 1.90 ± 0.04 a       | 0.13 ± 0.01 b            | 0.06 ± 0.00 a            | 1.95 ± 0.06 a      | 0.05 ± 0.00 b            | 0.05 ± 0.00 a            |
| Control              | 1.83 ± 0.05 a       | 0.11 ± 0.01 b            | 0.07 ± 0.00 a            | 2.02 ± 0.05 a      | 0.05 ± 0.00 b            | 0.05 ± 0.00 a            |
| <i>p-value</i>       | 0.1619              | <b>0.0030</b>            | 0.7708                   | 0.2060             | <b>0.0077</b>            | 0.9588                   |
| <b>Treatment (T)</b> | 0.0617              | 1.0000                   | 0.4930                   | 0.1452             | 0.1004                   | 0.5298                   |
| <b>Vine Age (A)</b>  | 0.2271              | <b>0.0007</b>            | 0.6186                   | 0.1657             | <b>0.0058</b>            | 0.9562                   |
| <b>T x A</b>         | 0.3861              | 0.0738                   | 0.6186                   | 0.4052             | 0.0521                   | 0.7965                   |

**Supplemental Table S5.** Berry analysis at harvest, displaying Brix, pH, and TA. One-way analysis of variance (ANOVA) showing treatment means followed by standard error of the mean. Different letters within a column indicate significant differences between treatment groups based on Student's *t*-test (*n* = 3). Significant *p*-values (< 0.05) are shown in bold fonts.

|                  | Brix           | pH            | Titrateable Acidity (TA) (g/L) |
|------------------|----------------|---------------|--------------------------------|
| <b>Treatment</b> |                |               |                                |
| Irrigated        | 23.44 ± 0.35 a | 3.49 ± 0.04 a | 6.63 ± 0.19 a                  |
| Dry-farmed       | 23.18 ± 0.27 a | 3.47 ± 0.01 a | 6.30 ± 0.12 a                  |

|                      |                |               |               |
|----------------------|----------------|---------------|---------------|
| <b>Vine Age</b>      |                |               |               |
| Young                | 23.62 ± 0.16 a | 3.54 ± 0.02 a | 6.95 ± 0.12 a |
| Old                  | 23.08 ± 0.39 a | 3.45 ± 0.02 b | 5.90 ± 0.04 c |
| Control              | 23.23 ± 0.52 a | 3.44 ± 0.04 b | 6.55 ± 0.10 b |
| <i>p-value</i>       | 0.9248         | 0.0894        | <.0001        |
| <b>Treatment (T)</b> | 0.5959         | 0.6629        | <.0001        |
| <b>Vine Age (A)</b>  | 0.6658         | <b>0.0435</b> | <.0001        |
| <b>T x A</b>         | 0.9163         | 0.1723        | <b>0.0112</b> |

**Supplemental Table S6.** Research Lab 2021 berry composition parameters at harvest. Two-way analysis of variance (ANOVA) showing treatment means followed by standard error of the mean. Measurements by treatment and vine age with interaction effects. Different letters within a column indicate significant differences between treatment groups based on Student's *t*-test (*n* = 3). Significant *p*-values (< 0.05) are shown in bold fonts.

|                      | L-Malic acid<br>(g/L) | Tartaric acid<br>(g/L) | Glucose + Fructose<br>(g/L) | Ammonia (mg/L)   | Alpha-amino<br>compounds (as N)<br>(mg/L) | Yeast assimilable<br>nitrogen (mg/L) | Potassium (mg/L)   |
|----------------------|-----------------------|------------------------|-----------------------------|------------------|-------------------------------------------|--------------------------------------|--------------------|
| <b>Treatment</b>     |                       |                        |                             |                  |                                           |                                      |                    |
| Irrigated            | 2.25 ± 0.29 a         | 6.88 ± 0.06 a          | 238.33 ± 4.21 a             | 135.67 ± 12.34 a | 153.00 ± 11.37 a                          | 264.78 ± 17.96 a                     | 1958.89 ± 107.41 a |
| Dry-farmed           | 1.82 ± 0.12 b         | 6.90 ± 0.04 a          | 235.44 ± 3.27 a             | 147.00 ± 8.31 a  | 150.67 ± 7.31 a                           | 271.67 ± 13.91 a                     | 1911.11 ± 26.59 a  |
| <b>Vine Age</b>      |                       |                        |                             |                  |                                           |                                      |                    |
| Young                | 2.74 ± 0.21 a         | 6.95 ± 0.04 a          | 239.50 ± 2.00 a             | 174.83 ± 2.33 a  | 185.00 ± 3.44 a                           | 329.00 ± 2.56 a                      | 2070.00 ± 44.12 a  |
| Old                  | 1.45 ± 0.05 c         | 6.82 ± 0.06 a          | 234.67 ± 4.91 a             | 119.00 ± 2.91 b  | 127.67 ± 4.81 b                           | 225.67 ± 7.07 c                      | 1808.33 ± 42.93 a  |
| Control              | 1.93 ± 0.21 b         | 6.90 ± 0.08 a          | 236.50 ± 6.24 a             | 130.17 ± 13.70 b | 142.83 ± 6.74 c                           | 250.00 ± 4.63 b                      | 1926.67 ± 138.10 a |
| <i>p-value</i>       | <b>&lt;.0001</b>      | 0.7128                 | 0.9695                      | <b>0.0110</b>    | <b>&lt;.0001</b>                          | <b>&lt;.0001</b>                     | 0.3166             |
| <b>Treatment (T)</b> | <b>0.0079</b>         | 0.7778                 | 0.6391                      | 0.2795           | 0.6770                                    | 0.1969                               | 0.6514             |
| <b>Vine Age (A)</b>  | <b>&lt;.0001</b>      | 0.3896                 | 0.8056                      | <b>0.0016</b>    | <b>&lt;.0001</b>                          | <b>&lt;.0001</b>                     | 0.1588             |
| <b>T x A</b>         | <b>0.0279</b>         | 0.6816                 | 0.9195                      | 0.9356           | 0.0949                                    | 0.0721                               | 0.3766             |
